# Supplementary material for: High molar mass cyclic poly(l-lactide) obtained by means of neat tin(ii) 2-ethylhexanoate
Source: Royal Society of Chemistry journal article supplement (doi:10.1039/d0py00811g), 2020-01-01
Supplement: d0py00811g1.pdf [file d0py00811g1.pdf]

## Supplementary Information

# High molar mass cyclic poly(L-lactide)s by means of neat tin (II) 2-ethylhexanoate

Hans R. Kricheldorf and Steffen M. Weidner

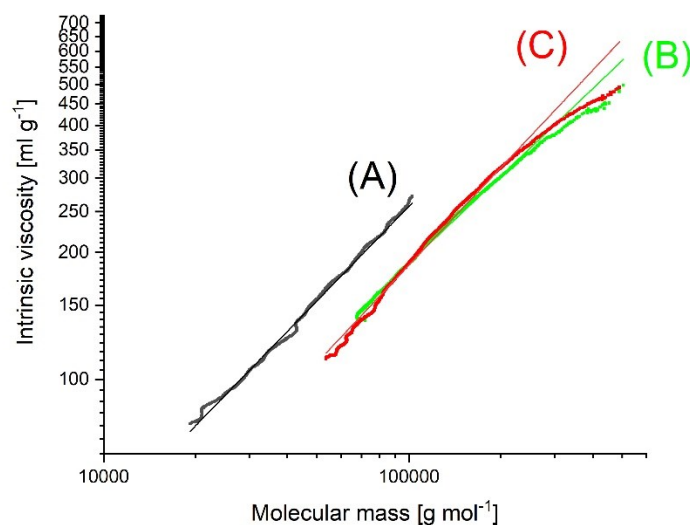

Figure S 1 MHS measurements of (A) Purapol L105, (B) polylactide prepared at 160°C/1h with Lac/Cat = 1000/1 (No. 6A, Table 2), (C) Lac/Cat = 4000/1 (No. 8, Table 2)

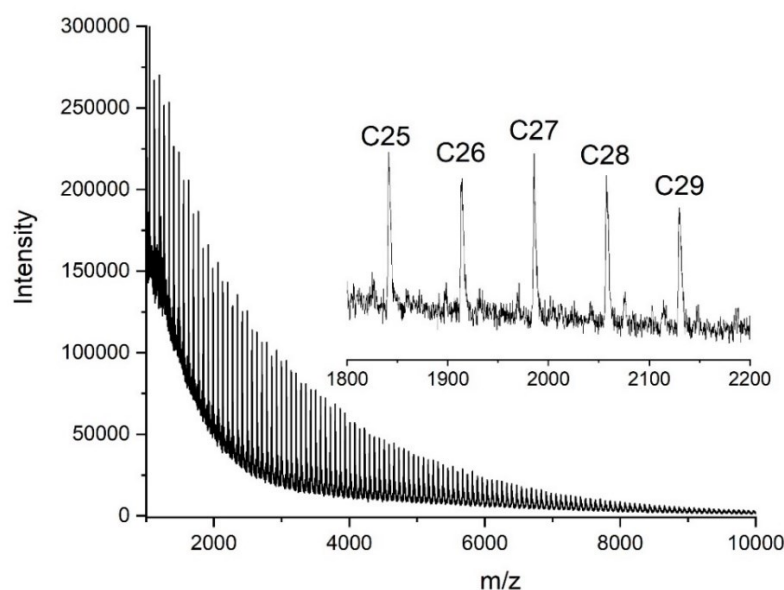

Figure S2A MALDI-TOF mass spectrum of the polylactide prepared at 120°C/4h with Lac/Cat = 1000/1 (No. 7, Table 3)

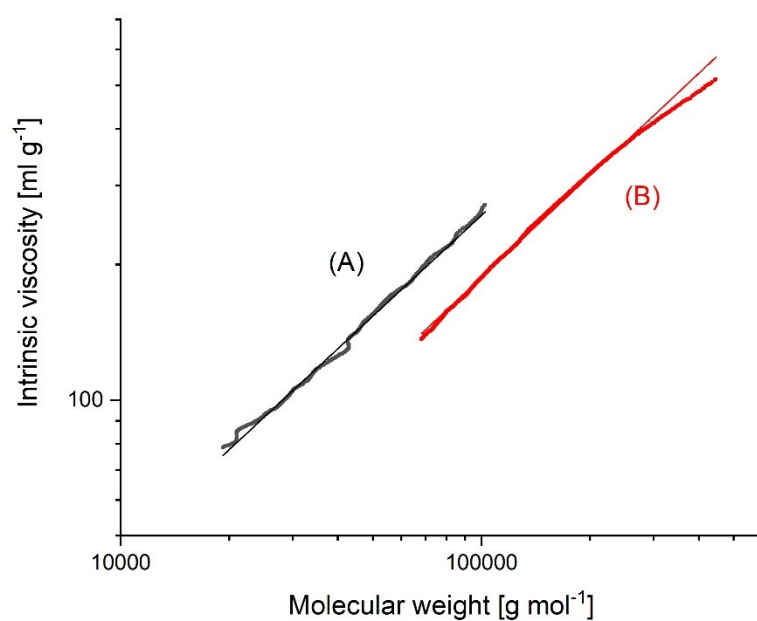

Figure S2B MHS measurement of (A) Purapol L105, (B) polylactide prepared at 120°C/4h with Lac/Cat = 1 000/1) (No. 7, Table 3)

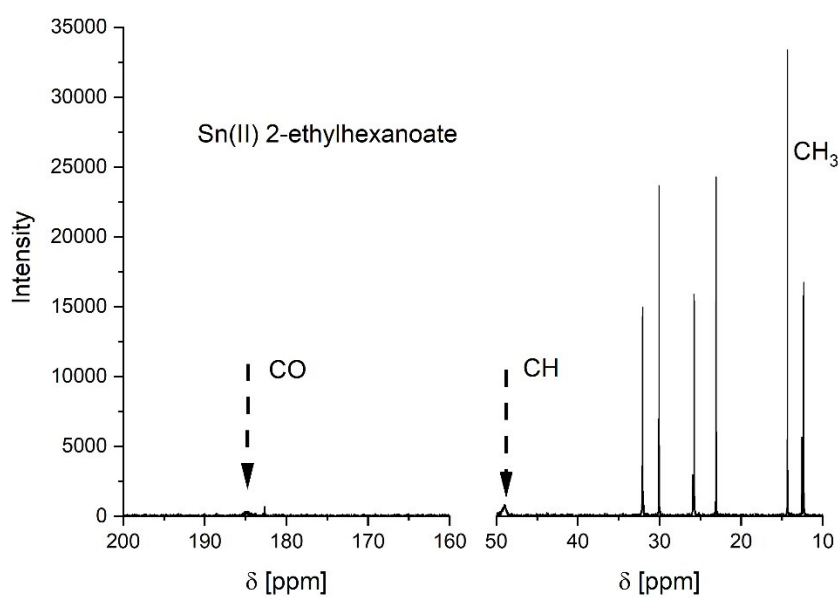

Figure S3 150 MHz <sup>13</sup>C NMR spectrum of SnOct<sub>2</sub>

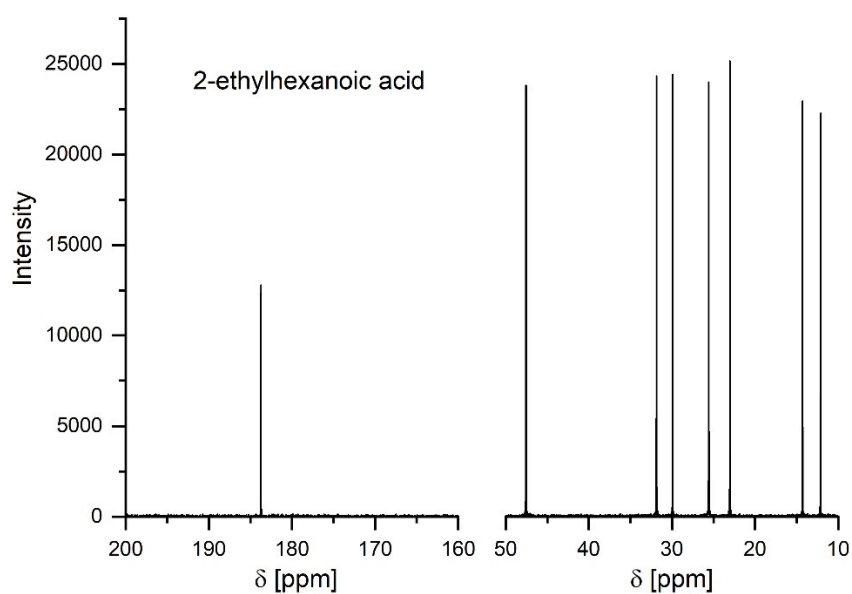

Figure S4 150 MHz  $^{13}\text{C}$  NMR spectrum of 2-ethylhexanoic acid

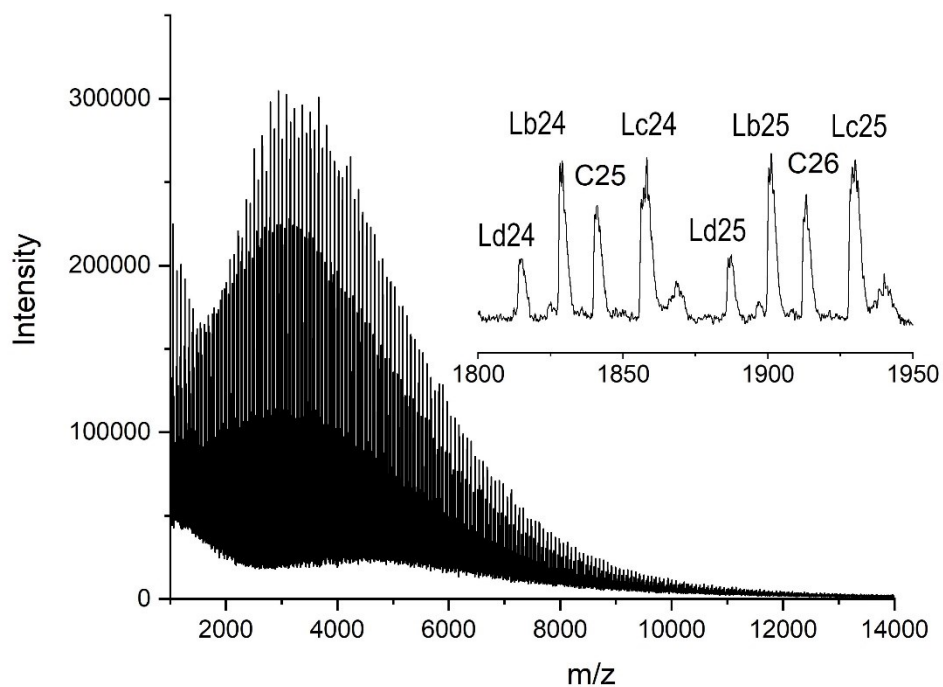

Figure S5 MALDI TOF mass spectrum of Ac-PLA-Et (Lc, Scheme 5) after 0.5h at 180°C.

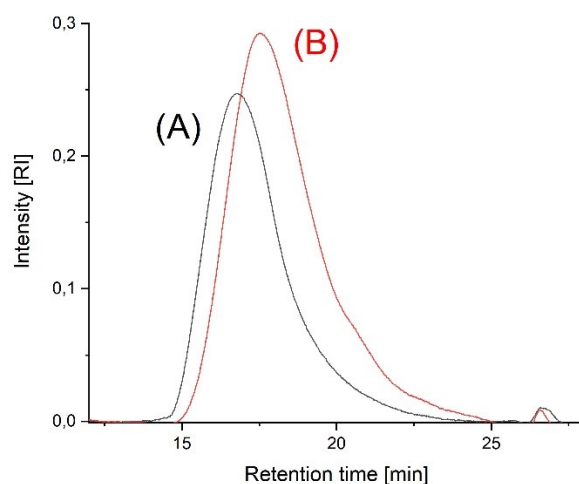

Figure S6 SEC curves of polylactides prepared at 160°C: (A) Lac/Cat = 1000/1, 1h (No. 6A, Table 2), (B) Lac/Cat = 1000/1, 8h (No. 6B, Table 2)

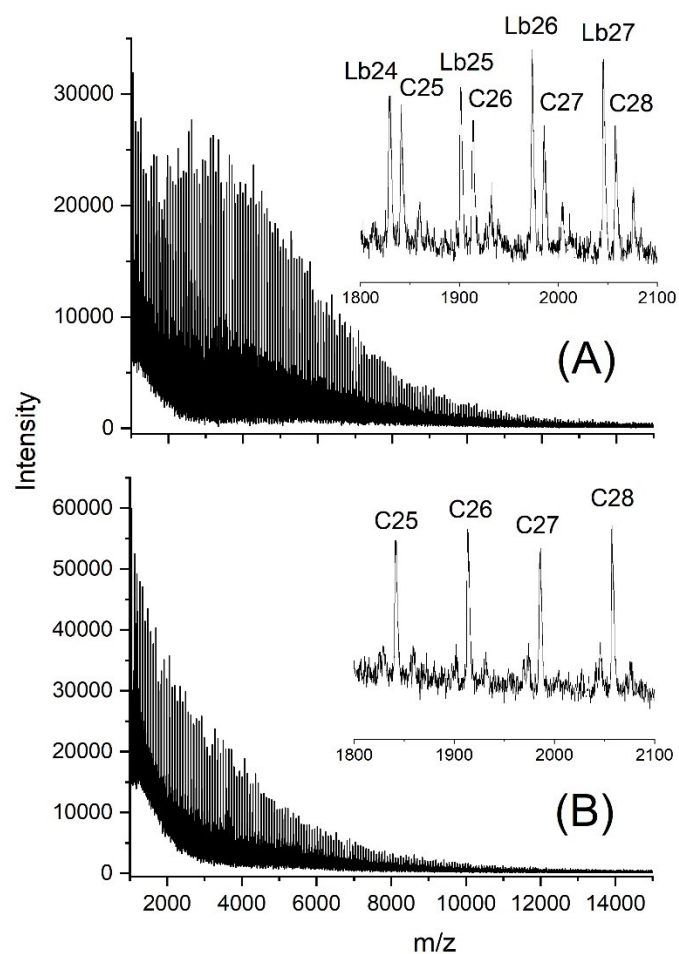

Figure S7 MALDI TOF mass spectra of polylactides prepared with  $\text{SnAc}_2$  at 160°C (A) Lac/Cat = 100/1 (No. 3, Table 5), (B) Lac/Cat = 400/1 (No. 5, Table 5)

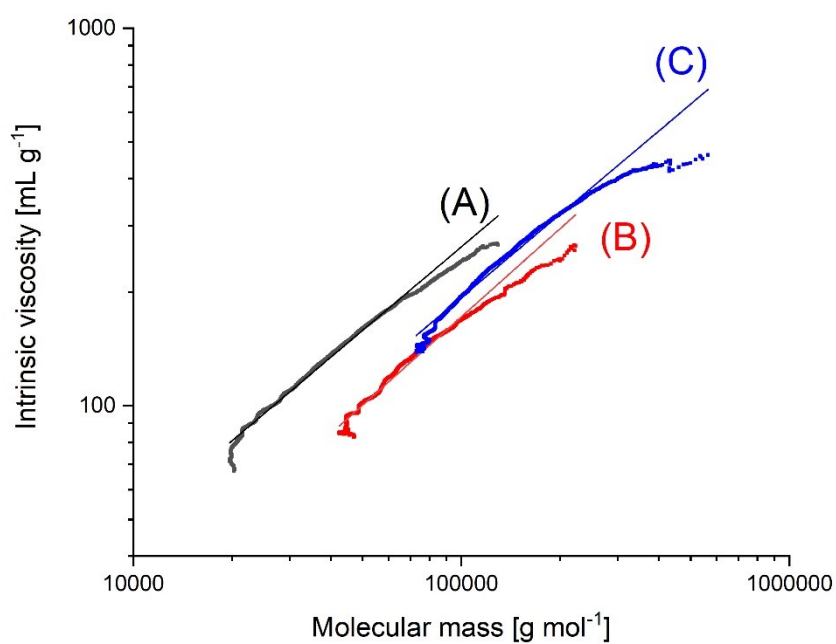

Figure S8 MHS measurements of (A) Purapol L105, polylactide prepared with  $\text{SnAc}_2$  at  $160^\circ\text{C}$  (B)  $\text{Lac/Cat} = 200/1$  (No.4, Table 5) and (C)  $\text{Lac/Cat} = 1\,000/1$  (No.7, Table 5),

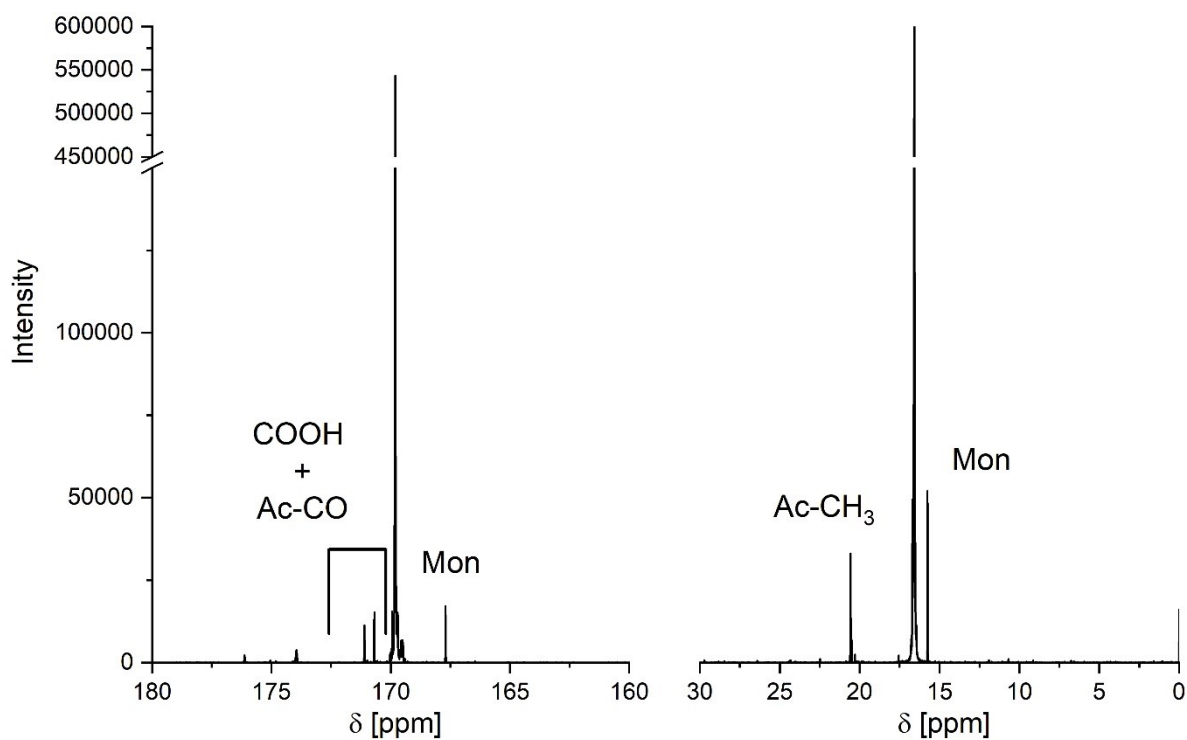

Figure S9 150 MHz  $^{13}\text{C}$  NMR spectrum of polylactide polymerized with tin(II)acetate in bulk at  $160^\circ\text{C}$  (25/1, No. 1, Table 5).
